# Supplementary material for: Brassica and Sinapis Seeds in Medieval Archaeological Sites: An Example of Multiproxy Analysis for Their Identification and Ethnobotanical Interpretation
Source: MDPI journal article supplement (doi:10.3390/plants11162100), 2022-08-12
Supplement: s1 [file s1]

**Supplementary Information Table S2.** Sequences of barcode primers used to amplify material in this study. Primers generated from *Brassica napus* L. strain ZY036 chloroplast complete genome sequence (Genbank: GQ861354)

| Primer             | Sequence                           | Primer Position on GQ861354 |
|--------------------|------------------------------------|-----------------------------|
| <i>matK1Fo</i>     | CGAGTTCCATTCGTAATTTG               | 3985-4004                   |
| <i>matK1Fi</i>     | ATAGATTAGTACCTAATACGGGTA           | 3930-3953                   |
| <i>matK1Ro</i>     | TTATCAATATACTGCTTCTTTTAC           | 3809-3832                   |
| <i>matK1Ri</i>     | TACTCGTTCTTTTACACATCC              | 3818-3838                   |
| <i>matK1aFo</i>    | CCTAGTCCGTTTGGGTTAGGTTG            | 3844-3866                   |
| <i>matK1aFi</i>    | CGTTTGGGTTAGGTTGGAGATGGAT          | 3835-3859                   |
| <i>matK1aRo</i>    | ATCTTTAATAGGTTTCTGTTCGT            | 3690-3712                   |
| <i>matK1aRi</i>    | ACCTAATCGCTCTTTTGATTTTGG           | 3763-3786                   |
| <i>matK1bFo</i>    | TTCCAAAATCAAAAGAGCGAT              | 3768-3789                   |
| <i>matK1bFi</i>    | CCAAAATCAAAAGAGCGATTAGGT           | 3763-3786                   |
| <i>matK1bRo</i>    | GTTCTGAAATGACATAGTGTGCG            | 3590-3612                   |
| <i>matK1bRi</i>    | TGAAATGACACATAGTGCGATACAGTCA       | 3594-3621                   |
| <i>matK1cFo</i>    | GGAGAAATTTCAAGGATATTTAGAGTTCG      | 3510-3538                   |
| <i>matK1cFi</i>    | GGATATTTAGAGTTCGATGGGGCTC          | 3501-3525                   |
| <i>matK1cRo</i>    | ATCAAACGATTCTGTTCGTACATTCTG        | 3314-3339                   |
| <i>matK1cRi</i>    | ATTAAGCGTTTCACAATTAGTGAACATA       | 3344-3370                   |
| <i>matK4Fo</i>     | CGCTTAATTTTGC GAATGTACGAACAGAATC   | 3321-3351                   |
| <i>matK4Fi</i>     | GATTATTCCCACTAAGGATTTGAAC          | 3292-3316                   |
| <i>matK4Ro</i>     | CTTTTACCCGGTAACGTAGGGTTTGAACC      | 3027-3055                   |
| <i>matK4Ri</i>     | GTAGGGTTTGAACCAAGATTTCTAG          | 3042-3066                   |
| <i>matK5aFo</i>    | CTACGCAAGCAGTCTTCTCATTTACGATC      | 2846-2874                   |
| <i>matK5aFi</i>    | AGCAGTCTTCTCATTTACGATCGACATC       | 2840-2867                   |
| <i>matK5aRo</i>    | GAATGTATTTTCCATGATATCTAACATA       | 2697-2724                   |
| <i>matK5aRi</i>    | TTCCATGATATCTAACATAATGTAGGA        | 2706-2732                   |
| <i>matK5Fo</i>     | TACCGGGTAAAAGATGCCTCTT             | 3018-3039                   |
| <i>matK7Ro</i>     | TCATTGCACACAGCTTTCTCTATG           | 1797-1820                   |
| <i>rbcLa-f (E)</i> | AGTCCACCGCGTAGACATTCAT             | 54213-54234                 |
| <i>rbcL590R</i>    | ATGTCACCACAAACAGAGACT              | 53645-53665                 |
| <i>rbcL1Fo</i>     | CTATTCCTAATTTATGTCGAGTAGACCTTG     | 53562-53591                 |
| <i>rbcL1Fi</i>     | TGCAAGAATTCTAAATTCATGACTTGTAGGGA   | 53606-53637                 |
| <i>rbcL1Ro</i>     | GGCTGGTAAGCCCATCGGTCCACACAGTTGTC   | 53842-53873                 |
| <i>rbcL1Ri</i>     | CATGTACCAGTAGAAGATTCAGCAGCTACCGCAG | 53808-53841                 |
| <i>rbcLR319</i>    | GGTCTAAAGGGTAAGCTACATA             | 53942-53963                 |
| <i>rbcL3Fo</i>     | ATCCGCGAAGAACTATGGTAGAGCAGTT       | 54184-54211                 |
| <i>rbcL3Fi</i>     | TAGAGCAGTTTATGAATGTCTACGTGGTG      | 54202-54230                 |

Supplementary Information Table S2 continued

| Primers           | Sequences 5'- 3'                    | Primer Position on GQ861354 |
|-------------------|-------------------------------------|-----------------------------|
| <i>rbcL3Ro</i>    | TCATCATTCTTCGCATGTACCCGCAGTA        | 54370-54398                 |
| <i>rbcL3Ri</i>    | TTCTTCGCATGTACCCGCAGTAGCATTCA       | 54363-54391                 |
| <i>rbcL4Fo</i>    | GAGAATTGGGAGTTCCTATCGTAATGC         | 54417-54440                 |
| <i>rbcL4Fi</i>    | TTGGGAGTTCCTATCGTAATGCATGACTACTCAAG | 54422-54452                 |
| <i>rbcL4Ro</i>    | TTTACCTACTACTACTGTACCCGCGTGA        | 54622-54641                 |
| <i>rbcL4Ri</i>    | CTACTACTGTACCCGCGTGAACATGATCTC      | 54612-54641                 |
| <i>rbcL5Fo</i>    | CGATGATTATGTTGAAAAAGACCGAAGTCTATGTT | 54694-54722                 |
| <i>rbcL5Fi</i>    | GAAAAAGACCGAAGTCGTGGTATC            | 54707-54730                 |
| <i>rbcL5Ro</i>    | ATGCTTCTAGAGCTACTCGGTTAGCTACGGCA    | 54892-54923                 |
| <i>rbcL5Ri</i>    | CTACTCGGTTAGCTACGGCACCCGGTGCATT     | 54881-54911                 |
| <i>trnH-psbAF</i> | ACTGCCTTGATCCACTTGGC                | 75-94                       |
| <i>trnH-psbAR</i> | CGAAGCTCCATCTACAAATGG               | 365-385                     |
